# Supplementary material for: Development and psychometric validation for evaluating written medicine information in Thailand: The Consumer Information Rating Form
Source: HighWire-hosted journal article supplement (doi:10.1136/bmjopen-2021-053740), 2021-10-01
Supplement: bmjopen-2021-053740supp001_data_supplement.pdf [file bmjopen-2021-053740supp001_data_supplement.pdf]

## Supplemental material 1 – The Consumer Information Rating Form (final Thai version)

หมายเลข .....

## “แบบทดสอบเครื่องมือในการประเมินข้อมูลสำหรับผู้บริโภค”

## ส่วนที่ 1 แบบฟอร์มการประเมินข้อมูลสำหรับผู้บริโภค (Consumer Information Rating Form; CIRF)

ผู้วิจัยขอขอบคุณสำหรับความกรุณาของท่านในการตอบคำถามเกี่ยวกับแผ่นเอกสารข้อมูลยาที่แนบมานี้ ผู้วิจัยขอความร่วมมือจากผู้บริโภคเพียงบางท่านในการช่วยพิจารณาเอกสารนี้ ความคิดเห็นของท่านมีความสำคัญต่อการประเมินและพัฒนาข้อมูลยาต่อไป และข้อมูลทั้งหมดจะเก็บไว้เป็นความลับ

สำหรับคำถามในแต่ละข้อ กรุณา วงกลมล้อมรอบตัวเลข ที่สะท้อนความคิดเห็นของท่านได้ใกล้เคียงมากที่สุด

1. ในภาพรวม ท่านคิดว่าข้อมูลในเอกสารข้อมูลยาที่ท่านได้รับนี้มีความยากหรือง่ายอย่างไร

|                                        | ง่ายมาก | ค่อนข้างง่าย | ปานกลาง | ค่อนข้างยาก | ยากมาก |
|----------------------------------------|---------|--------------|---------|-------------|--------|
| การอ่านข้อมูล                          | 1       | 2            | 3       | 4           | 5      |
| ความเข้าใจข้อมูล                       | 1       | 2            | 3       | 4           | 5      |
| ความสามารถในการจำข้อมูลได้             | 1       | 2            | 3       | 4           | 5      |
| ความสามารถในการหาตำแหน่งข้อมูลที่สำคัญ | 1       | 2            | 3       | 4           | 5      |
| การนำข้อมูลที่ได้ไปใช้ประโยชน์ในอนาคต  | 1       | 2            | 3       | 4           | 5      |

2. ถ้าหากท่านใช้ยานี้เป็นครั้งแรกและได้รับเอกสารข้อมูลนี้จากโรงพยาบาลหรือร้านยา มีความเป็นไปได้มากน้อยเพียงใดที่ท่านจะปฏิบัติตามหัวข้อด้านล่างต่อไปนี้

|                              | เป็นไปได้<br>อย่างมาก | ค่อนข้าง<br>เป็นไปได้ | ไม่แน่ใจ | ค่อนข้าง<br>เป็นไปได้<br>ไม่ได้ | เป็นไปได้<br>ไม่ได้<br>อย่างมาก |
|------------------------------|-----------------------|-----------------------|----------|---------------------------------|---------------------------------|
| ท่านจะอ่านแผ่นข้อมูล         | 1                     | 2                     | 3        | 4                               | 5                               |
| ท่านจะนำข้อมูลไปใช้ประโยชน์  | 1                     | 2                     | 3        | 4                               | 5                               |
| ท่านจะเก็บแผ่นข้อมูลไว้ต่อไป | 1                     | 2                     | 3        | 4                               | 5                               |

3. ในกรณีที่ท่านใช้นี้เป็นครั้งแรก โปรดวงกลมล้อมรอบตัวเลข ที่แสดงความคิดเห็นของท่านเกี่ยวกับปริมาณข้อมูลที่ได้รับจากเอกสารข้อมูลยาในแต่ละหัวข้อด้านล่างต่อไปนี้ และท่านคิดว่าข้อมูลเหล่านี้มีประโยชน์อย่างไร

|                                                               | ปริมาณข้อมูลมากน้อยเพียงใด |         |                | ประโยชน์ของข้อมูลเป็นอย่างไร |                        |                   |
|---------------------------------------------------------------|----------------------------|---------|----------------|------------------------------|------------------------|-------------------|
|                                                               | มาก<br>เกินไป              | พอเหมาะ | น้อย<br>เกินไป | มีประโยชน์<br>มาก            | ค่อนข้างมี<br>ประโยชน์ | ไม่มี<br>ประโยชน์ |
| ตัวยาหรือประโยชน์ของยานี้                                     | 1                          | 2       | 3              | 1                            | 2                      | 3                 |
| ผู้ที่ไม่ควรใช้นี้                                            | 1                          | 2       | 3              | 1                            | 2                      | 3                 |
| คำแนะนำเฉพาะเกี่ยวกับวิธีการใช้ยา                             | 1                          | 2       | 3              | 1                            | 2                      | 3                 |
| ข้อควรระวังที่จำเป็นขณะใช้นี้                                 | 1                          | 2       | 3              | 1                            | 2                      | 3                 |
| ผลข้างเคียงที่อาจเกิดขึ้นและข้อควรปฏิบัติเมื่อเกิดผลข้างเคียง | 1                          | 2       | 3              | 1                            | 2                      | 3                 |
| วิธีการเก็บรักษายานี้และข้อมูลทั่วไป                          | 1                          | 2       | 3              | 1                            | 2                      | 3                 |

4. ข้อความด้านล่างต่อไปนี้เป็นการอธิบายเกี่ยวกับการออกแบบ การวางรูปแบบ และลักษณะทั่วไปของเอกสารข้อมูลยาที่ท่านได้รับ

กรุณา วงกลมล้อมรอบตัวเลข ที่อธิบายความคิดเห็นของท่านได้ดีที่สุด

|                                        |                           |                                   |
|----------------------------------------|---------------------------|-----------------------------------|
| การเรียงลำดับเนื้อหาไม่ดีเลย           | 1.....2.....3.....4.....5 | การเรียงลำดับเนื้อหาดี            |
| เอกสารไม่ดึงดูดความสนใจเลย             | 1.....2.....3.....4.....5 | เอกสารดึงดูดความสนใจ              |
| ขนาดตัวพิมพ์ของเอกสารไม่เหมาะสม        | 1.....2.....3.....4.....5 | ขนาดตัวพิมพ์ของเอกสารเหมาะสม      |
| ลักษณะทั่วไปของเนื้อหาทำให้รู้สึกกังวล | 1.....2.....3.....4.....5 | ลักษณะทั่วไปของเนื้อหาทำให้สบายใจ |
| ในภาพรวม เอกสารข้อมูลไม่มีประโยชน์     | 1.....2.....3.....4.....5 | ในภาพรวม เอกสารข้อมูลมีประโยชน์   |
| ข้อมูลไม่มีความเป็นกลาง                | 1.....2.....3.....4.....5 | ข้อมูลมีความเป็นกลาง              |
| ช่องว่างระหว่างบรรทัดไม่เหมาะสม        | 1.....2.....3.....4.....5 | ช่องว่างระหว่างบรรทัดเหมาะสม      |

5. ท่านมีข้อเสนอแนะอื่นๆ เกี่ยวกับแผ่นเอกสารข้อมูลนี้หรือไม่

.....

.....

.....
